# Supplementary material
Source: PubMed Central journal article supplement (PMC3064946)
Supplement: NIHMS273055-supplement-Supp1.pdf [file NIHMS273055-supplement-Supp1.pdf]

## **SUPPLEMENTAL MATERIAL**

### **Yale VIRGO Coordinating Center Staff and Follow-Up Center Members:**

Amy Browning BA, Jo Cecille Demarest MS, Gabrielle C. Douglas MBioMedSci, Mary Geda RN MSN, Marcia Johnson BS, Dana Limone BA, Daoud Mikhail MIA, Monique Plinck, Valerie Solli BA, and Anjuli Tohan BS.

### **VIRGO Coordinators (enrolling participants as of July 15, 2010):**

#### **United States:**

Allegheny General Hospital, Cheryl Snyder RN BSN; Baptist Cardiac & Vascular Institute, Baptist Hospital of Miami, Claudia Hodgson MSN ARNP CCRP, Ivette Cruz ARNP CRC; Baptist Hospital Inc. – Pensacola, John Murray RN, Libby Klein RN; Baylor Research Institute, Megan Crowe AA, Christopher Henry RC, Patrica Melly PA-C, Poupak Moshayedi RC, Avora Trotter, Ilene Vought; Beth Israel Deaconess Medical Center, Sunny Jhamnani MD MBBS, Nina Grude MS ACNP; Boston Medical Center, Denise Fine BS; Bozeman Deaconess Hospital, Jennifer Kack RN; Bridgeport Hospital, Tina Cullen RN CCRC; Bryan LGH Heart Institute, Cheryl Orosco RN BS, Nicci Thompson RN BSN, Corena Wiechert RN; Butler Memorial Hospital, Lauren McCune RN BSN; California Medical Center, Jessica Redford; Cardiovascular Clinical Research Center, Arline Roberts RN, Rebecca Terban MD, Rachel Wang; Cardiovascular Research Foundation of Louisiana, Becky Toler RN BSN; Cedars-Sinai Heart Institute, Margo Minissian ACNP-BC MSN CNS AACC FAHA, Nilly Moore RN; Central Maine Heart and Vascular Institute, Snow Tardif RN; Citrus Memorial Health Systems, Evelyn Korjack RN, Rebecca West RN; Cotton-O'Neil Clinical Research Center, Suann Luther-Ford RN, Erin Malone RN CCRP, Mary J Martell, Cheryl Snyder RN; Cox South Hospital, Rachel Parr BSN CCRP; D Guthrie Foundation for Education & Research, Kamie Hoey RN BS CCRP, Cathy Lanning BS; Danbury Hospital, Judy Nagy CCRC; Denver Health Medical Center, Elhum Karimkhani MSPH, Christine M Neuman RN BSN; Erie County Medical Center, Dennis M Robinson RN; Fletcher Allen Health Care, Michaelanne Rowen RN CCRC; Forsyth Medical Center, Brian Coleman, Jennifer Short, Yvonne Whitley RN BSN; Geisinger Clinic - Cardiology, Nicole Flaugh, Amy Temple RN; Genesis Medical Center, Caroline Sloane RN BS; Glacier View Cardiology, Susie Rhoades CCRC; Good Samaritan Hospital, Sandy Rosse; Hackensack University Medical Center, Diane Agar, Wendy Sowa-Maldarelli MS RT RDCS; Hamot Medical Center, Molly Witkowski RN CCRP, Maureen Dwyer; Henry Ford Hospital, Julianne Longlade RN BSN; Hospital of St. Raphael, Anna Andreozzi RN, Nancy Cassella RN; The International Heart Institute of Montana, Kristen Schooler AAS, Kelli Hoffman RN BSN; Jefferson Regional Medical Center, Vanessa Sullivan RN; Krannert Institute of Cardiology Clarian Cardiovascular Center Methodist Hospital, Jeri Steward BS; Leonard J Chabert Medical Center, Erika A Falgout RN BSN; Long Beach Memorial Med Center, Victoria Barbara, Brenda Montgomery RN BSN, Joanne Morrison RN, Cindy Peters MSN, Emily Tin LVN; Los Robles Hospital and Medical Center, Cherry Papanicolaou RN, Marianne Boone RN, Sandy Wisler; Medical College of Georgia, Kate Sideman RN BSN; Memorial Medical Center (Sutter Gould Medical Foundation), Janice Fisher RN

BSN, Brenda Lynch RN, Jeanne McAdams RN, Kathleen Myers-Rasmussen RN BSN; Memorial Health System, Jayne Thompson RN BSBA, Mary Mihi LPN, Karen Baur RN MHA, Gary Mangold RN, Marcia Weller-Summers BSN, Maureen Barrett-McGee BSN RNBC, Renee Gentry RN; Mercy General Hospital, Deirdre Harris RN BSN, Sandra Spencer RN, Sarah Bordash RN BSN, Cherri Corcoran, RN, Christie Hogan, RN; Mercy Hospital and Medical Center, Sharon Holloway NP; Meriter Hospital, Jane Nelson Worel RN MS APNP, Lindsey Rosemeyer RN, Kay Schrauth; Mid America Heart Institute St Luke's Hospital, Carole Decker RN PhD, Beth Gialde, Karen Nugent RRT; Minneapolis Heart Institute, Kari Williams BS CCRC, Denise Windenburg BA CCRC; Montefiore / Albert Einstein Medical Center, Margaret Galvin RN BSN, Sridhar Mani MD, Eugen Vartolomei MD; Morehouse School of Medicine, JoAnn Cross RN, Sunday Nkemdiche; Mount Clemens Regional Medical Center, Kim O'Mara RN; Munson Medical Center, Jan Boettcher RN, Richard Hall RN PhD, Jane Stauffer BSN CCRC, Marjorie Wilson NP; New Hanover Regional Medical Center, Mary Beth Bobek Pharm D; Northshore University Health System, Jean Skelskey RN; Oakwood Hospital and Medical Center, Jeanne Gugudis RN BSN, Lynne Meharg RN; Orlando Health, Loretta Butler RN, Stacey O'Brien RN BSN, Carita Thomas; Overlook Hospital, Elena Lobur, RN, Rosmery Montesino, Bernardo Vargas BS CRC, Betty Merveil-Ceneus RN APN-C MSN, Jacqueline Fearon-Clarke RN APNBC; Parker Adventist Hospital, Sylvia Crisman-Kasiak RN BSN; Parkview Research Center/Fort Wayne Cardiology, Jeanne Carroll RN BA CCRC; Pepin Heart Research Institute, Jessica Norcini RN BSN BA MSPH, Mary Nunnery BA; Presbyterian Heart Group, Patricia Nail, Susan Salazar RN BSN CRC, Rae Woods RN BSN CRC; Presbyterian Hospital - Mid Carolina Cardiology, Elizabeth K Marshall RN BA CCRP, Abigail McGinnis RN BSN, Thomas Ashton; Providence Healthcare Network, Samina Ali MD, Diana Houb RN; Providence Hospital, Susan Glass RN, Lynn Lewis; Rhode Island Hospital, Janice Muratori RNP, Maria Medeiros RN; Saddleback Memorial Medical Center, Deborah Rusert RN MSN; Samaritan Heart and Vascular Institute, Mary Hamlin Chilvers RN BSN; Sentara Hospitals, Susan Kaplan RN PhD; Sharp Grossmont Hospital, Joyce McGinty MS RN, Penny Burke RN, Jodi Gabriel RN, Annelies Dixon MSN RN APRN; Sparrow Hospital, Terry L Habetler RN BSN; Spectrum Health, Cynthia Giles, Kim McClain RN BSN, Sue Rosema BSN RN, Cameron Taylor, Beth Van Over; Spectrum Health, Stacie VanOosterhout MED; St Francis Hospital and Medical Center, Suzanne Onorato, Lucy Prantis RN, Margie Whitaker; St John's Mercy Medical Research Institute, Rebecca Baker RN BSN CCRC, Pearl Stokoe RN; St John's Regional Medical Center, Rita Stiles RN MSN; St Mary's Medical Center, Binnie Howard RN BSN; St Mary's Medical Center, Carrie Vanston MSN MHA; St. Elizabeth's Hospital, Bonita Schneider RT MS; St. John Hospital & Medical Center, Renee Bess BS RDCS RVT, Debra Steffen; St. Joseph's Medical Center, Therese Connolly RN BSN, Theresa Weaver RN BSN; St. Rita's Medical Center, Teresa Knueve RN BSN, Candy Palmer RN; St. Vincent Hospital & Health Services, Regina Margiotti RN, Sherrie Steckley RN; Stanford University Medical Center, Homa Tavana BS; Stony Brook University Medical Center, Melissa Daubert, Jeanne Kidd MA, Jawad Shahid; Summa Health System (Akron City Hospital), Diane Jasso RN CCRP; SUNY Downstate Medical Center, Meriam F Caboral RN MSN NP-C; Sutter Medical Center Sacramento, Dene Franklin, Beverly Seiler RN; The Indiana Heart Hospital, Maggie Potrikus RN CCRC, Brenda Newman RN, Jamie Douthitt, Joanna Greene-Nashold RN;

The Ohio State University Medical Center, Tonya Carter RN, Denise Fadorsen, Catherine Frentz, Luba Mazanec; The Valley Hospital, Jacqueline Backhaus RN CCRP; Torrance Memorial Medical Center, Jaquelina Patti CCRP, Suellen G Hosino RN BSN, Joy Burkhardt CCRP; University of Alabama at Birmingham, Meredith Fitz-Gerald RN BSN, Chanel N Mason; University of Chicago Medical Center, Christine Curtis BS CPA Med; University of Iowa Hospitals and Clinics, Denice Wells, Jennifer Twombly RN BSN; University of Kansas Hospital, Caroline Murray CCRC; University of Michigan Health Systems, Wendy Warshal RN BSN; University of North Carolina at Chapel Hill, Carl Schuler RN; University of Southern California, Karen Adams, Betsy Johnson, Stephanie Mullin RN BSN PHN CCRC; University of Texas Southwestern Medical Center at Dallas (UTSW), Kristi Pinkston RN MA, Griselda Soto CMA; Virginia Commonwealth University, Andrzej Dziekonski RN, Debra Spillman; Washington Hospital Center, Shreejana Pokharel MPH; Washington University School of Medicine, Jane Humphrey RN, Kristin M Luepke RN MSN; Washington Hospital Center, Michelle Deville, Shreejana Pokharel MPH; Waukesha Memorial Hospital, Cheryl Knapp RN MBA CCRP; Winthrop University Hospital, Barbara George RN MSN EdD, Dipti Patel BSN RN MPH, Wendy Drewes RN BSN; Yale-New Haven Hospital, Marcia Johnson BS, Mary Geda RN MSN.

### **Spain - IM-JOVEN:**

Complejo Asistencial de León, León, Teresa Arias RN, Nuria Marcos RN; Hospital Arnau Villanova, Lleida, Esther Piñol RN, Laura Barta RN; Hospital Clínic, Barcelona, Elisabet Domingo RN; Hospital Clínico San Carlos, Madrid, Arancha Asensio RN, Paloma Verdasco RN, Mónica Collado RN; Hospital Clínico Universitario de Santiago, Santiago de Compostela, Maria Moure RN, Ana Seoane RN; Hospital Clínico Universitario de Valladolid, Valladolid, Carolina de Álvaro RN, Pedro Mota; Hospital del Mar, Barcelona, Paula Cabero RN, Cristina Soler RN; Hospital General de Cataluña, Barcelona, Natalia Molina RN; Hospital General de Valencia, Valencia, Mercedes Zamorano RN; Hospital General Universitario Gregorio Marañón, Madrid, Elena Chamberlain RN; Hospital Montecelo, Pontevedra, Isabel Gómez RN, Eva Gonzalez RN; Hospital Universitari Germans Trias, Badalona, Beatriz Gil RN, Antonio Tovar RN; Hospital Universitario Central de Asturias, Oviedo, Adelina Martínez RN; Hospital Universitario de Bellvitge, Barcelona, Elena Calvo Booriuso RN; Hospital Universitario de Canarias, Tenerife, M<sup>a</sup> Candelaria Gorrin RN; Hospital Universitario Joan XXIII, Tarragona, Sonia Ginel RN, Almudena García RN; Hospital Universitario Virgen de la Victoria, Málaga, Gloria Millán RN; Hospital Universitario Virgen de las Nieves, Málaga, José Sánchez RN, Juan I Laguna RN; Hospital Vall d'Hebron, Barcelona, Carmen Revilla RN; Hospital Virgen de la Arrixaca, Murcia, M<sup>a</sup> Dolores Vallés RN; Hospital Virgen de la Salud, Toledo, Gema Lozano RN, Raquel Urías RN; Hospital Virgen del Rocío, Sevilla, M<sup>a</sup> Isabel García RN.

### **Australia:**

Rachel Dreyer, BSc(Hons); Yang Timothy Du, The Queen Elizabeth Hospital, Lyell McEwin Hospital, Adelaide.
